# Supplementary material for: Centimeter-size single crystals of 2D hybrid perovskites for shortwave light photodetection with a low detection limit
Source: Royal Society of Chemistry journal article supplement (doi:10.1039/d2tc05466c), 2023-01-01
Supplement: d2tc05466c1.pdf [file d2tc05466c1.pdf]

## Supporting information

### Centimeter-size Single Crystals of 2D Hybrid Perovskite for Shortwave Light Photodetection with Low Detection Limit

Chengshu Zhang,<sup>ab</sup> Hao Xiao,<sup>a</sup> Qianwen Guan,<sup>ad</sup> Tingting Zhu,<sup>ab</sup> Lishan Liang,<sup>a</sup> Ruiqing Li,<sup>ad</sup> Huang Ye,<sup>ad</sup> Xinyi Niu<sup>a</sup> and Junhua Luo<sup>abcde</sup>

<sup>a</sup> State Key Laboratory of Structural Chemistry, Fujian Institute of Research on the Structure of Matter, Chinese Academy of Sciences, Fuzhou, Fujian, 350002, P. R. China

<sup>b</sup> School of Physical Science and Technology, ShanghaiTech University, Shanghai 201210, P. R. China

<sup>c</sup> School of Chemistry and Chemical Engineering Jiangxi Normal University, Jiangxi 330022, P. R. China

<sup>d</sup> University of Chinese Academy of Sciences, Beijing 100049, P. R. China

<sup>e</sup> Fujian Science & Technology Innovation Laboratory for Optoelectric Information of China, Fuzhou 350108, P. R. China

## Figures

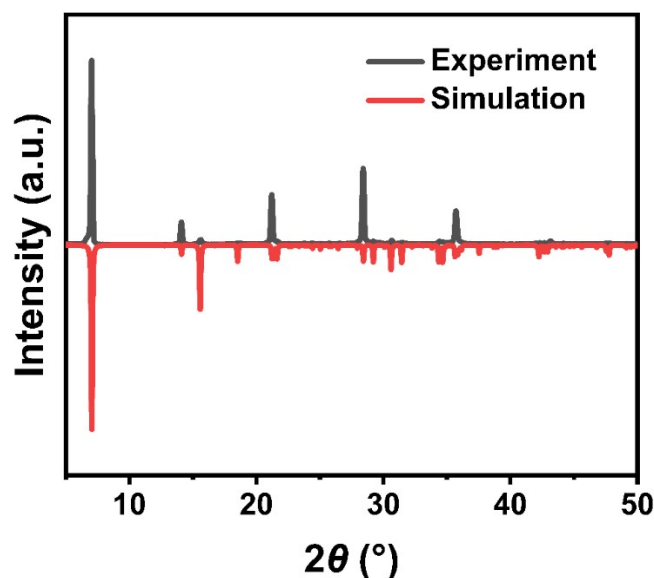

**Figure S1.** Experiment and simulation X-ray diffraction patterns of (PA)<sub>2</sub>PbBr<sub>4</sub>

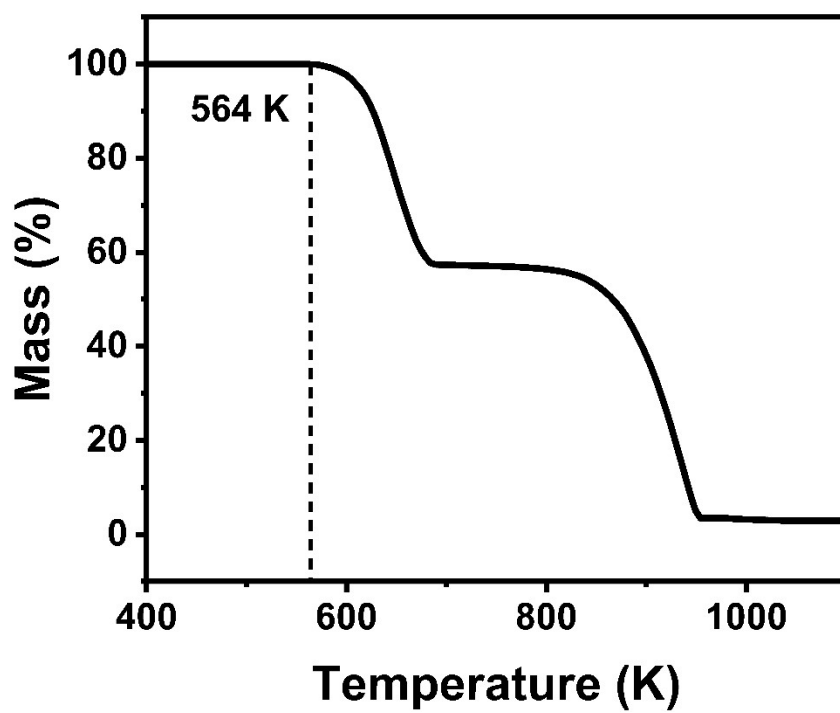

Figure S2. Thermogravimetric analysis curve of  $(\text{PA})_2\text{PbBr}_4$

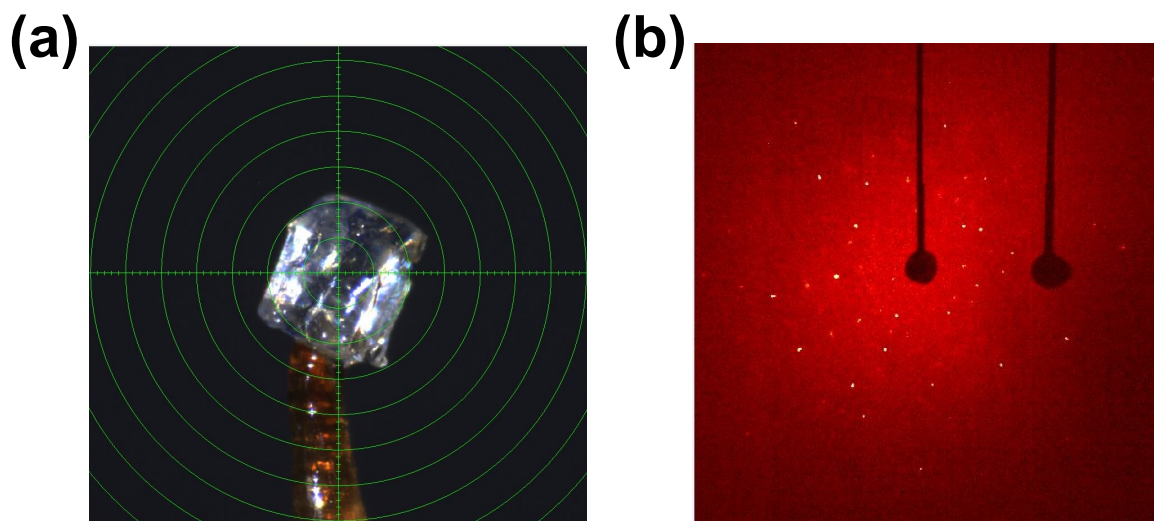

Figure S3. a) Image and b) SCXRD diffraction patterns of the  $(\text{PA})_2\text{PbBr}_4$  single crystal

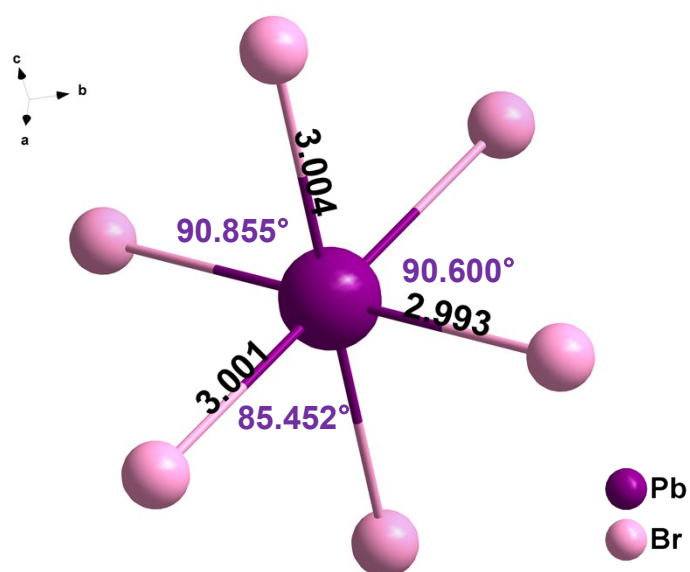

**Figure S4.** The bond length and bond angle of the  $[\text{PbBr}_6]$  octahedron.

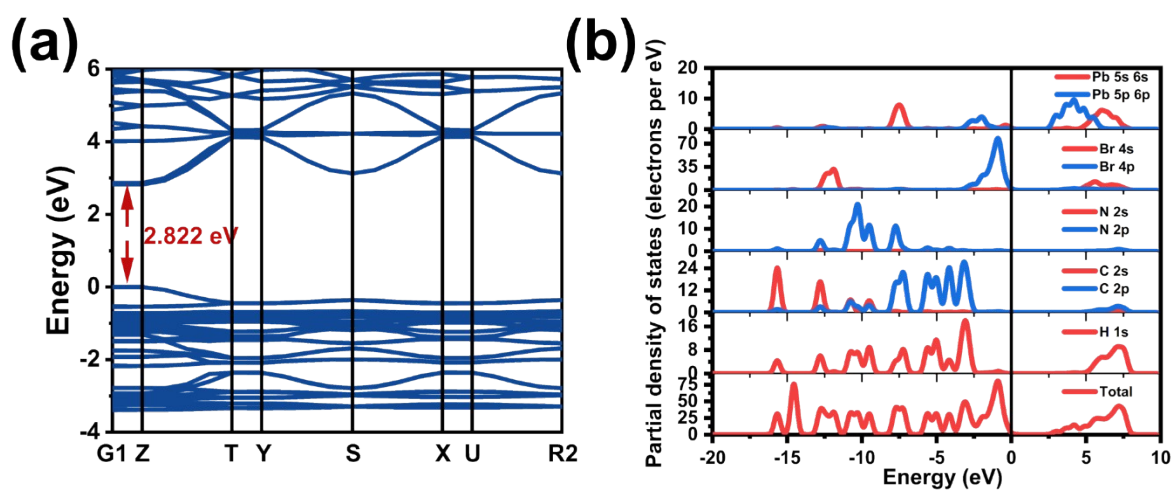

**Figure S5.** (a) Calculated band structure diagram and (b) partial density of states spectra of  $(\text{PA})_2\text{PbBr}_4$ .

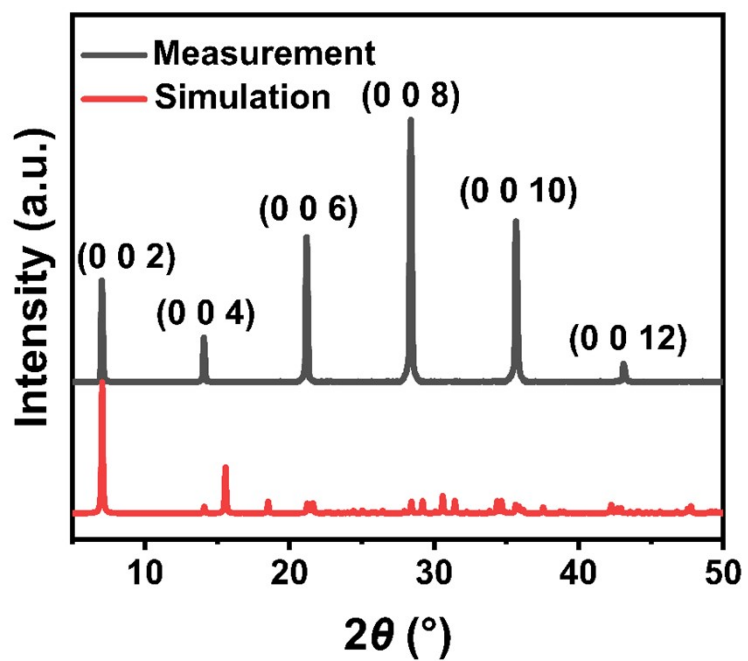

**Figure S6.** AFM images of the surface morphology of the bulk single crystals of  $(\text{PA})_2\text{PbBr}_4$ .

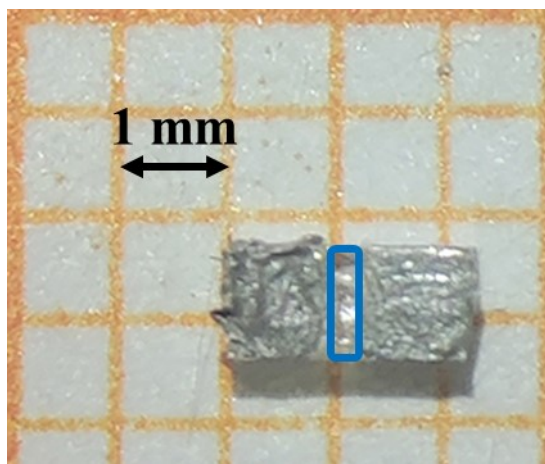

**Fig. S7** Photoelectric devices diagram

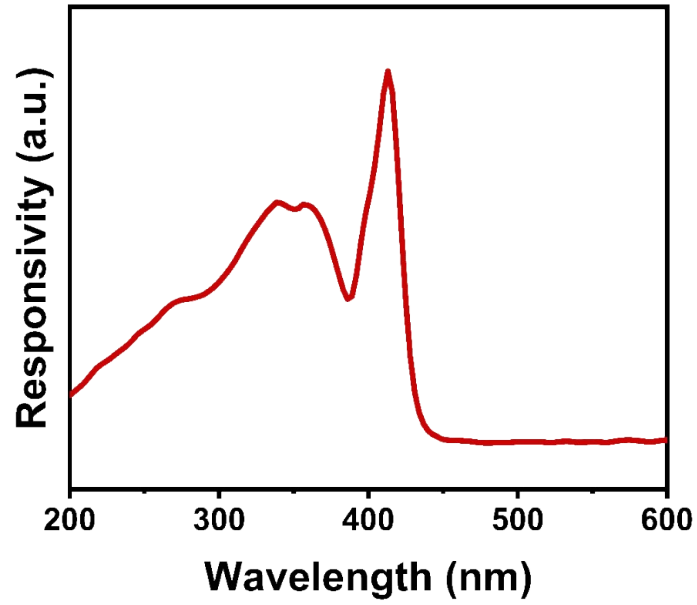

**Fig S8.** Spectral response of shortwave photodetector based on  $(\text{BA})_2\text{PbBr}_4$  under a bias voltage of 10 V.

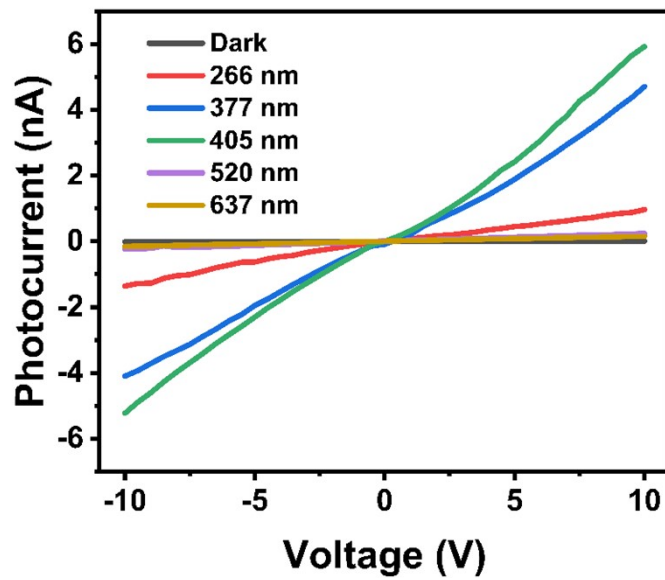

**Figure S9.**  $I$ - $V$  diagram under different wavelength light.

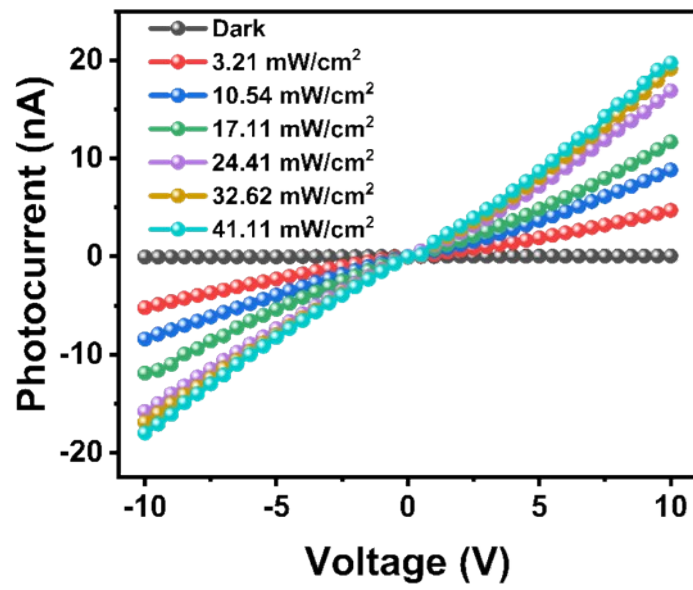

Figure S10.  $I$ - $V$  diagram under strong illumination at 405 nm.

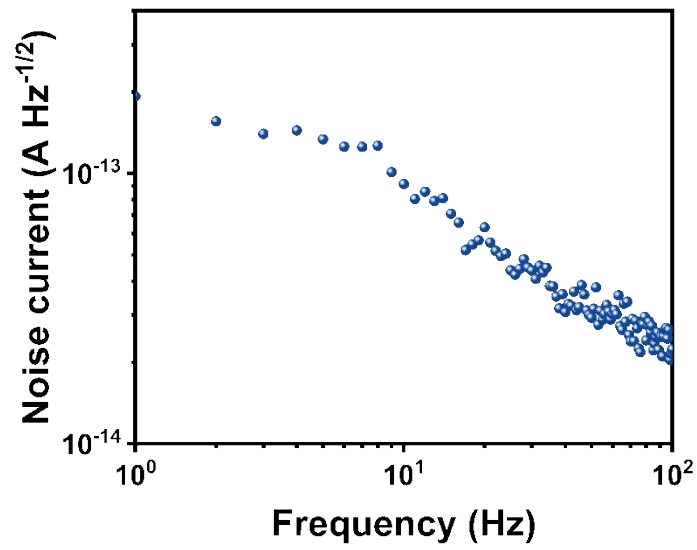

Fig S11. The measured noise current of the photodetector at different frequencies.

**Table S1.** Some similar reported photodetectors based on 2D hybrid perovskites.

| Materials                                                            | Wavelength (nm) | Detection Limit          | Detectivity (Jones)     | Ref. |
|----------------------------------------------------------------------|-----------------|--------------------------|-------------------------|------|
| (BA) <sub>2</sub> PbBr <sub>4</sub>                                  | 377             | 80 nW/cm <sup>2</sup>    | 2.06 × 10 <sup>12</sup> | [1]  |
| (BA) <sub>2</sub> (MA)Pb <sub>2</sub> Br <sub>7</sub>                | 405             | 1.2 μW/cm <sup>2</sup>   | 1.1 × 10 <sup>9</sup>   | [2]  |
| (BA) <sub>2</sub> (MA) <sub>2</sub> Pb <sub>3</sub> Br <sub>10</sub> | 405             | 2.13 mW/cm <sup>2</sup>  | 3.6 × 10 <sup>10</sup>  | [3]  |
| (BA) <sub>2</sub> (FA)Pb <sub>2</sub> Br <sub>7</sub>                | 405             | 82 nW/cm <sup>2</sup>    | 1.47 × 10 <sup>12</sup> | [4]  |
| (BA) <sub>2</sub> PbI <sub>4</sub>                                   | 420             | 0.2 mW/cm <sup>2</sup>   | -                       | [5]  |
| (PA) <sub>2</sub> (FA)Pb <sub>2</sub> I <sub>7</sub>                 | 520             | 46 μW/cm <sup>2</sup>    | 1.73 × 10 <sup>14</sup> | [6]  |
| (PA) <sub>2</sub> (G)Pb <sub>2</sub> I <sub>7</sub>                  | 550             | 1.2 mW/cm <sup>2</sup>   | 6.3 × 10 <sup>12</sup>  | [7]  |
| (PA) <sub>2</sub> (MA)Pb <sub>2</sub> I <sub>7</sub>                 | 600             | 8 mW/cm <sup>2</sup>     | 2.92 × 10 <sup>10</sup> | [8]  |
| (rBA) <sub>2</sub> PbI <sub>4</sub>                                  | 560             | 113 μW/cm <sup>2</sup>   | 1.23 × 10 <sup>10</sup> | [9]  |
| (PEA) <sub>2</sub> SnI <sub>4</sub>                                  | 470             | 195.8 μW/cm <sup>2</sup> | 2.06 × 10 <sup>11</sup> | [10] |
| This work                                                            | 405             | 20 nW/cm <sup>2</sup>    | 6.02 × 10 <sup>12</sup> |      |

## Reference

- 1 L. Liang, X. Niu, X. Zhang, Z. Wang, J. Wu and J. Luo, Ultraviolet Photodetection with Low Detection Limit Using Inch-Sized Two-Dimensional Hybrid Perovskite Crystal, *Advanced Optical Materials*, 2022, 2201342.
- 2 L. Li, X. Liu, Y. Li, Z. Xu, Z. Wu, S. Han, K. Tao, M. Hong, J. Luo and Z. Sun, *J. Am. Chem. Soc.*, Two-Dimensional Hybrid Perovskite-Type Ferroelectric for Highly Polarization-Sensitive Shortwave Photodetection, 2019, **141**, 2623–2629.
- 3 L. Li, Z. Sun, P. Wang, W. Hu, S. Wang, C. Ji, M. Hong and J. Luo, Tailored Engineering of an Unusual (C<sub>4</sub>H<sub>9</sub>NH<sub>3</sub>)<sub>2</sub>(CH<sub>3</sub>NH<sub>3</sub>)<sub>2</sub>Pb<sub>3</sub>Br<sub>10</sub> Two-Dimensional Multilayered Perovskite Ferroelectric for a High-Performance Photodetector, *Angew. Chem. Int. Ed.*, 2017, **56**, 12150–12154.
- 4 Y. Ma, J. Wang, Y. Liu, S. Han, Y. Li, Z. Xu, W. Guo, J. Luo, M. Hong and Z. Sun, High performance self-powered photodetection with a low detection limit based on a two-dimensional organometallic perovskite ferroelectric, *J. Mater. Chem. C*, 2021, **9**, 881–887.
- 5 J. Zhou, Y. Chu and J. Huang, Photodetectors Based on Two-Dimensional Layer-Structured Hybrid Lead Iodide Perovskite Semiconductors, *ACS Appl. Mater. Interfaces*, 2016, **8**, 25660–25666.
- 6 S. Han, Y. Yao, X. Liu, B. Li, C. Ji, Z. Sun, M. Hong and J. Luo, Highly Oriented Thin Films of 2D Ruddlesden-Popper Hybrid Perovskite toward Superfast Response Photodetectors, *Small*, 2019, **15**, 1901194.
- 7 Z. Xu, Y. Li, X. Liu, C. Ji, H. Chen, L. Li, S. Han, M. Hong, J. Luo and Z. Sun, Highly Sensitive and Ultrafast Responding Array Photodetector Based on a Newly Tailored 2D Lead Iodide Perovskite Crystal, *Advanced Optical Materials*, 2019, **7**, 1900308.
- 8 S. Han, P. Wang, J. Zhang, X. Liu, Z. Sun, X. Huang, L. Li, C. Ji, W. Zhang, B. Teng, W. Hu, M. Hong and J. Luo, Exploring a Polar Two-dimensional Multi-layered Hybrid

Perovskite of  $(C_5H_{11}NH_3)_2(CH_3NH_3)Pb_2I_7$  for Ultrafast-Responding Photodetection, *Laser & Photonics Reviews*, 2018, **12**, 1800060.

9 L. Li, L. Jin, Y. Zhou, J. Li, J. Ma, S. Wang, W. Li and D. Li, Filterless Polarization-Sensitive 2D Perovskite Narrowband Photodetectors, *Adv. Optical Mater.*, 2019, **7**, 1900988.

10 L. Qian, Y. Sun, M. Sun, Z. Fang, L. Li, D. Xie, C. Li and L. Ding, 2D perovskite microsheets for high-performance photodetectors, *J. Mater. Chem. C*, 2019, **7**, 5353–5358.
